# Supplementary material for: Difference in F-Actin Depolymerization Induced by Toxin B from the Clostridium difficile Strain VPI 10463 and Toxin B from the Variant Clostridium difficile Serotype F Strain 1470
Source: MDPI journal article supplement (doi:10.3390/toxins5010106), 2013-01-11
Supplement: s1 [file s1]

## Supplementary Information

**Figure S1.** HeLa cells were treated with the indicated concentrations of TcdB for 4 h. The cytopathic effect was quantified as the number of rounded per total cells. Cell rounding was reflected by a reduced length of the longitudinal cell axis.

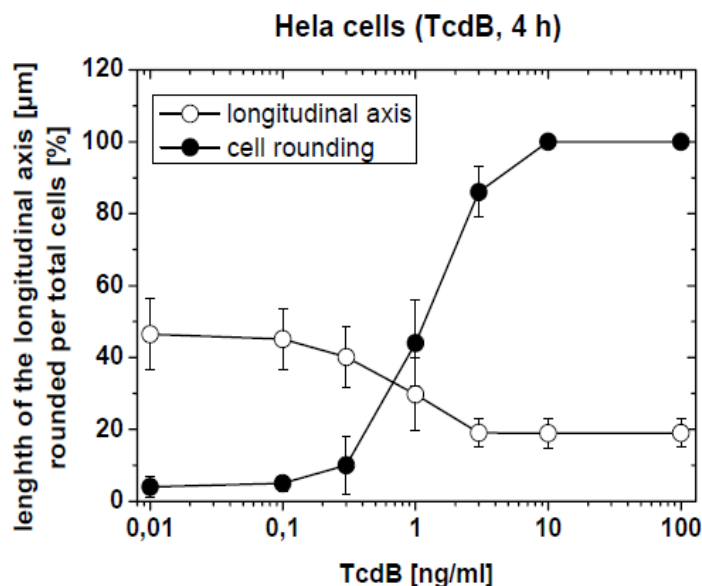

**Figure S2.** HEp-G2 cells were treated with the indicated concentrations of TcdB for 4 h. the cytopathic effect was quantified as the number of rounded per total cells. The F-actin concentration was measured by the rhodamine-phalloidin assay. The cellular level of F-actin in non-treated cells was set 100. Values are the mean  $\pm$  SD from three independent experiments made in triplicates.

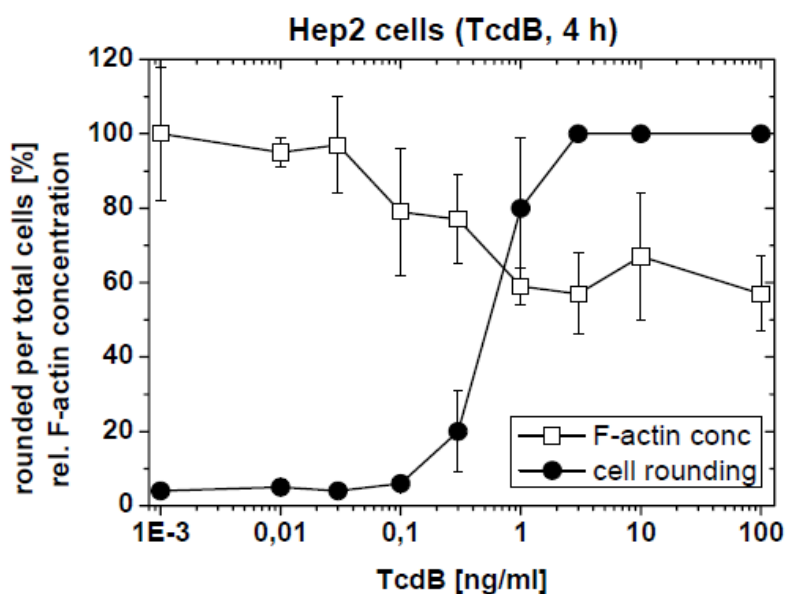

**Figure S3.** Rat basophilic leukemia (RBL) cells were treated with the indicated concentrations of TcdB for 4 h. The cytopathic effect was quantified as the number of rounded per total cells. The F-actin concentration was measured by the rhodamine-phalloidin assay. The cellular level of F-actin in non-treated cells was set 100. Values are the mean  $\pm$  SD from three independent experiments made in triplicates.

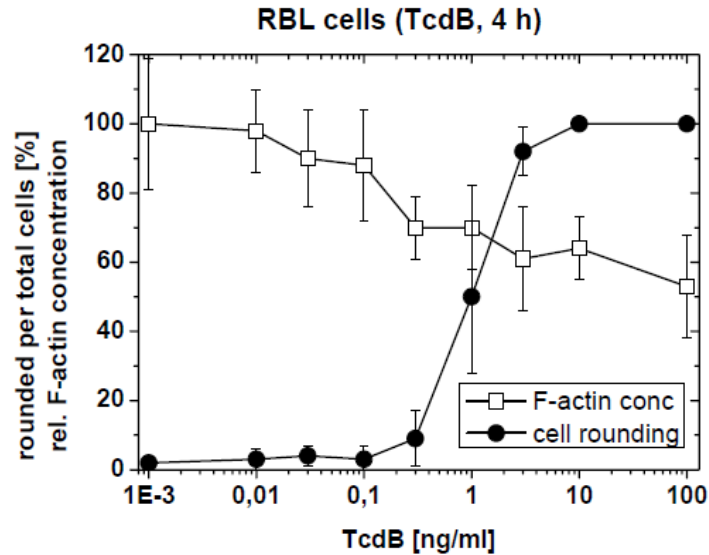

**Figure S4.** HeLa cells were treated with the indicated toxins for 4 h. Cells were lysed in F-actin stabilization buffer, followed by centrifugation to separate the F-actin (particular fraction P) from the G-actin pool (soluble fraction S). Actin signals were densitometrically quantified and given as the ratio of F-actin per G-actin. Values are the mean  $\pm$  SD from three independent experiments.

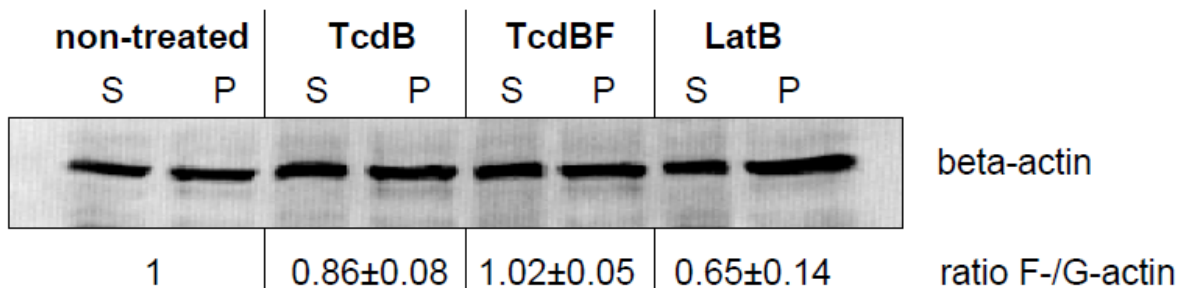

**Figure S5.** HeLa cells were treated with the indicated concentrations of TcdBF for 4 h. The cytopathic effect was quantified as the number of rounded per total cells. The F-actin concentration was measured by the rhodamine-phalloidin assay. The level of F-actin in non-treated cells was set 100. Values are the mean  $\pm$  SD from three independent experiments made in triplicates.

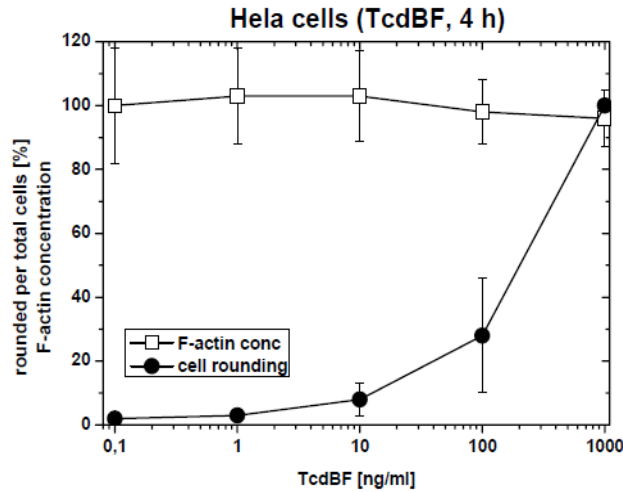

© 2013 by the authors; licensee MDPI, Basel, Switzerland. This article is an open access article distributed under the terms and conditions of the Creative Commons Attribution license (<http://creativecommons.org/licenses/by/3.0/>).
